# Supplementary material
Source: publisher figshare collection journal article supplement (https://adisjournals.figshare.com/articles/dataset/_/21896643)
Supplement: Supplementary file 1 [file 1]

# 依洛尤单抗在中国原发性高胆固醇血症和混合型血脂异常患者中的疗效和安全性：华佗随机临床试验的主要结果

## 摘要

**背景：**依洛尤单抗是一种全人源 PCSK9 抗体抑制剂，可显著降低 2 型糖尿病、高脂血症和混合性血脂异常患者的低密度脂蛋白胆固醇 (LDL-C)。这项为期 12 周的研究评价了依洛尤单抗在中国不同心血管风险的原发性高胆固醇血症和混合型血脂异常患者中的疗效和安全性。

**方法：**华佗是一项随机、双盲、安慰剂对照研究。已接受稳定优化他汀类药物治疗的 18 岁或以上的中国患者以 2:2:1:1 的比例随机接受依洛尤单抗 140 mg 每 2 周 1 次 (Q2W)、依洛尤单抗 420 mg 每月一次(QM)，或匹配的安慰剂治疗。联合主要终点是在第 10 周和第 12 周时 LDL-C 较基线的平均百分比变化以及第 12 周时 LDL-C 较基线的百分比变化。

**结果：**总体而言，241 名随机患者（平均年龄 [SD]，60.2 岁 [10.3]）分别接受了依洛尤单抗 140 mg Q2W (n = 79)、依洛尤单抗 420 mg QM (n = 80)、安慰剂 Q2W (n = 41) 或安慰剂 QM (n = 41)。对于第 10 周和第 12 周时 LDL-C 较基线的安慰剂校正的最小二乘平均百分比变化，依洛尤单抗 140 mg Q2W 组为-70.7%（95% CI，-78.0%至-63.5%）；依洛尤单抗 420 mg QM 组为-69.7%（95% CI，-76.5%至-63.0%）。依洛尤单抗组观察到所有其他血脂指标的显著改善。不同治疗组和不同给药方案的治疗期间不良事件的发生率相似。

**结论：**在中国原发性高胆固醇血症和混合型血脂异常患者中，依洛尤单抗显著降低了 LDL-C 和其他血脂指标，并且安全和耐受性良好 (NCT03433755)。
