# Supplementary material
Source: publisher figshare collection journal article supplement (https://adisjournals.figshare.com/articles/dataset/_/21896643)
Supplement: Supplementary file 2 [file 1]

# 原発性高コレステロール血症および混合型脂質異常症の中国人患者を 対象としたエボロクマブの有効性と安全性：HUA TUO 华佗 無作為化臨床試験の主要結果

## 要旨

**背景：**完全ヒト型 PCSK9 阻害抗体であるエボロクマブは、2 型糖尿病および高脂血症ならびに混合型脂質異常症患者において低比重リポ蛋白コレステロール（LDL-C）を有意に低下させる。この 12 週間試験では、心血管疾患のリスクレベルが異なる原発性高コレステロール血症および混合型脂質異常症の中国人患者を対象に、エボロクマブの有効性と安全性を評価した。

**方法：**HUA TUO 試験は、無作為化二重盲検プラセボ対照試験であった。安定した最適化スタチン療法を受けている 18 歳以上の中国人患者を、エボロクマブ 140 mg を 2 週間ごと（Q2W）に投与する群、エボロクマブ 420 mg を月 1 回（QM）投与する群、または対応するプラセボを投与する群に 2:2:1:1 の割合で無作為に割り付けた。共主要評価項目は、LDL-C の 10 週目と 12 週目の平均値および 12 週目の値のベースラインからの変化率であった。

**結果：**全体で、無作為化された患者 241 例（平均年齢 [SD] は 60.2 [10.3] 歳）において、エボロクマブ 140 mg Q2W（79 例）、エボロクマブ 420 mg QM（80 例）、プラセボ Q2W（41 例）またはプラセボ QM（41 例）を投与した。10 週目と 12 週目における、LDL-C のベースラインからのプラセボ補正最小二乗平均変化率は、エボロクマブ 140 mg Q2W 群では -70.7%（95% CI：-78.0%～-63.5%）、エボロクマブ 420 mg QM 群では -69.7%（95% CI：-76.5%～-63.0%）であった。エボロクマブ投与により、その他すべての脂質パラメータについても有意な改善が認められた。患者の治験薬投与下の有害事象発現率は、投与群間および投与レジメン全体で同程度であった。

**結論：**原発性高コレステロール血症および混合型脂質異常症の中国人患者では、エボロクマブは LDL-C およびその他の脂質を有意に低下させ、安全で忍容性が良好であった（NCT03433755）。
