# Supplementary material
Source: publisher figshare collection journal article supplement (https://adisjournals.figshare.com/articles/dataset/_/21896643)
Supplement: Supplementary file 3 [file 1]

# EFFICACY AND SAFETY OF EVOLOCUMAB

## in Chinese Patients With Primary Hypercholesterolemia and Mixed Dyslipidemia: Primary Results of a Phase 3 Randomized Clinical Trial

Hong Tan, Weimin Li, Zhouqing Huang, Yajun Han, Xuecheng Huang, Dongye Li, Xiaochun Xing, Maria Laura Monsalvo, You Wu, Jackie Mao, Lily Xin, Jiyan Chen, on behalf of HUA TUO study investigators

### HUA TUO 华佗 Study

A phase 3, randomized (2:2:1:1), double-blind, placebo-controlled 12-week study (NCT03433755)

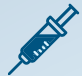

Evolocumab (140 mg SC Q2W and 420 mg SC QM) vs matched placebo

241 Chinese patients aged  $\geq 18$  years with **primary hypercholesterolemia and mixed dyslipidemia** at different levels of CV risk

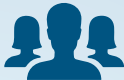

### Objective

Evaluate the **efficacy and safety** of evolocumab as an add-on to stable optimized statin therapy

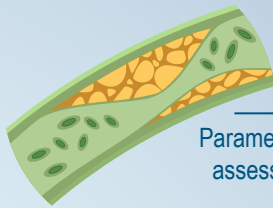

Parameters assessed

- LDL-C
- Non-HDL-C
- ApoB
- Lp(a)
- Total cholesterol

### Patient Characteristics

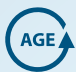

Mean (SD) age **60.2 (10.3) years**

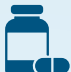

**Once-daily** stable optimized statin therapy  $\pm$  ezetimibe

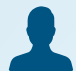

Male **67.6%**

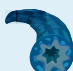

Mean (SD) LDL-C at baseline **116.1 (34.6) mg/dL**

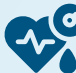

Hypertension **62.2%**

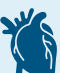

Coronary artery disease **85.9%**  
High / very high risk for CVD **92.1%**  
 $\geq 2$  risk factors for CVD **50.6%**

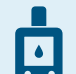

T2DM **28.6%**

### Efficacy

- Significant improvement in LDL-C and other lipids was observed with evolocumab 140 mg Q2W and evolocumab 420 mg QM vs matching placebo
- Reductions in LDL-C were maintained throughout the 12-week study in both evolocumab dosing regimens

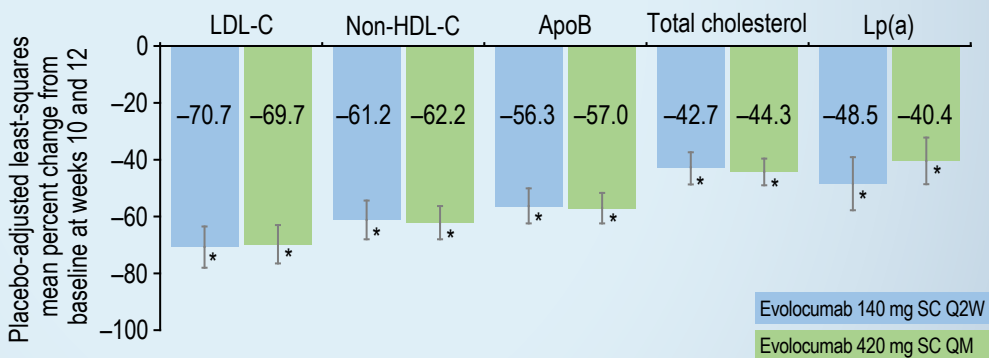

Error bars depict 95% CIs.

\*All treatment differences (evolocumab vs placebo) in the least-squares mean percent change from baseline for all lipid parameters were statistically significant ( $P < 0.0001$ ).

### Safety

Evolocumab vs placebo

$\geq 1$  TEAEs (patient incidence, %): **54.7% vs 54.9%**

SAEs (patient incidence, %): **4.4% vs 7.3%**

The majority of TEAEs were mild or moderate in severity and no TEAEs led to discontinuation of evolocumab or placebo

#### Most common TEAEs

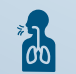

URT infection  
**8.2% vs 8.5%**

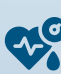

Hypertension  
**6.3% vs 6.1%**

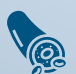

Hyperuricemia  
**3.8% vs 0.0%**

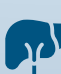

Hyperbilirubinemia  
**2.5% vs 4.9%**

### Conclusion

**Evolocumab significantly lowered LDL-C and other lipids, and was safe and well tolerated in Chinese patients with primary hypercholesterolemia and mixed dyslipidemia**

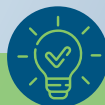

Adis

PEER-REVIEWED  
FEATURE

ApoB, apolipoprotein B; CV, cardiovascular; CVD, cardiovascular disease; CTCAE, Common Terminology Criteria for Adverse Event; HDL-C, high-density lipoprotein cholesterol; LDL-C, low-density lipoprotein cholesterol; Lp(a), lipoprotein(a); QM, once monthly; Q2W, once every two weeks; RCT, randomized clinical trial; SAE, serious adverse event; SC, subcutaneous; SD, standard deviation; TEAE, treatment-emergent adverse event; T2DM, type 2 diabetes mellitus; URT, upper respiratory tract. This graphical abstract represents the opinions of the authors. For a full list of declarations, including funding and author disclosure statements, and copyright information, please see the full text online
